# Supplementary material for: Killing from the inside: Intracellular role of T3SS in the fate of Pseudomonas aeruginosa within macrophages revealed by mgtC and oprF mutants
Source: PubMed Central journal article supplement (PMC6586356; doi:10.1371/journal.ppat.1007812), 2019-06-20
Supplement: ppat.1007812.s001.pdf [file ppat.1007812.s001.pdf]

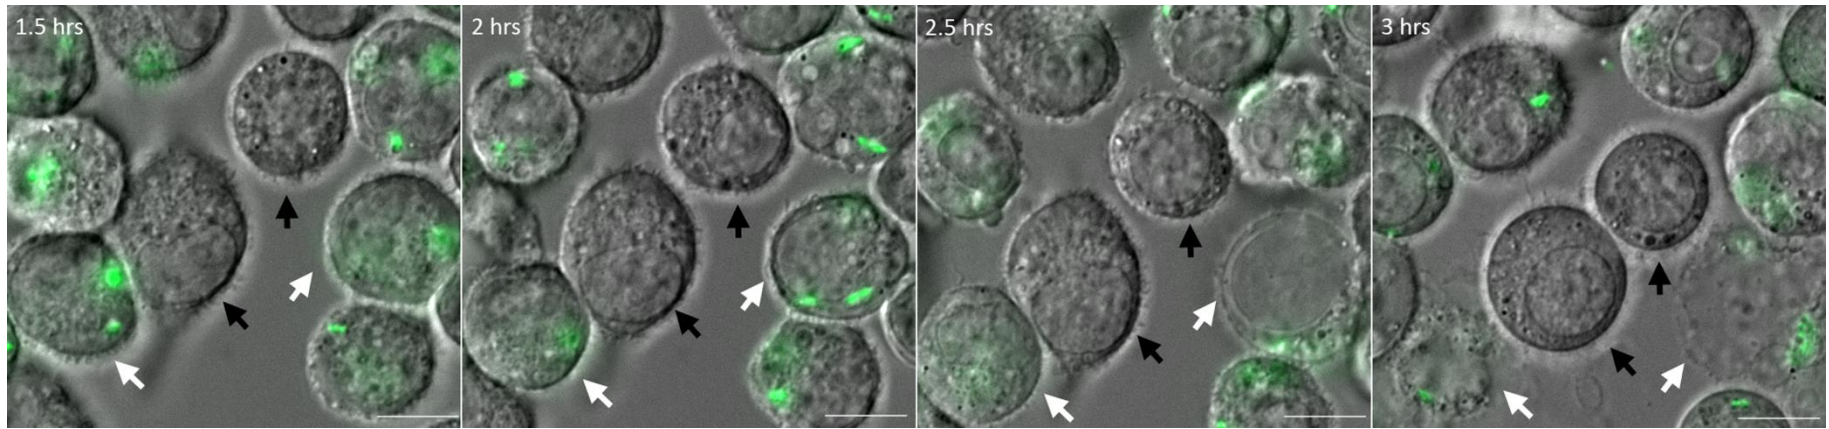

**S1 Fig. Live imaging of macrophages infected with *P. aeruginosa*.** J774 macrophages were infected with PAO1 wild-type strain expressing GFP. Time lapse imaging was started at 1.5 hrs post-phagocytosis. Cells were maintained in DMEM supplemented with gentamicin, at 37 °C and 5% CO<sub>2</sub> throughout imaging. White arrows point at infected cells that undergo lysis, whereas black arrows indicate uninfected cells that do not lyse. Images were taken between 1.5 hrs and 3 hrs post-phagocytosis as shown on the panels. Scale bar is equivalent to 10 μm.
