# Supplementary material for: Killing from the inside: Intracellular role of T3SS in the fate of Pseudomonas aeruginosa within macrophages revealed by mgtC and oprF mutants
Source: PubMed Central journal article supplement (PMC6586356; doi:10.1371/journal.ppat.1007812), 2019-06-20
Supplement: ppat.1007812.s002.pdf [file ppat.1007812.s002.pdf]

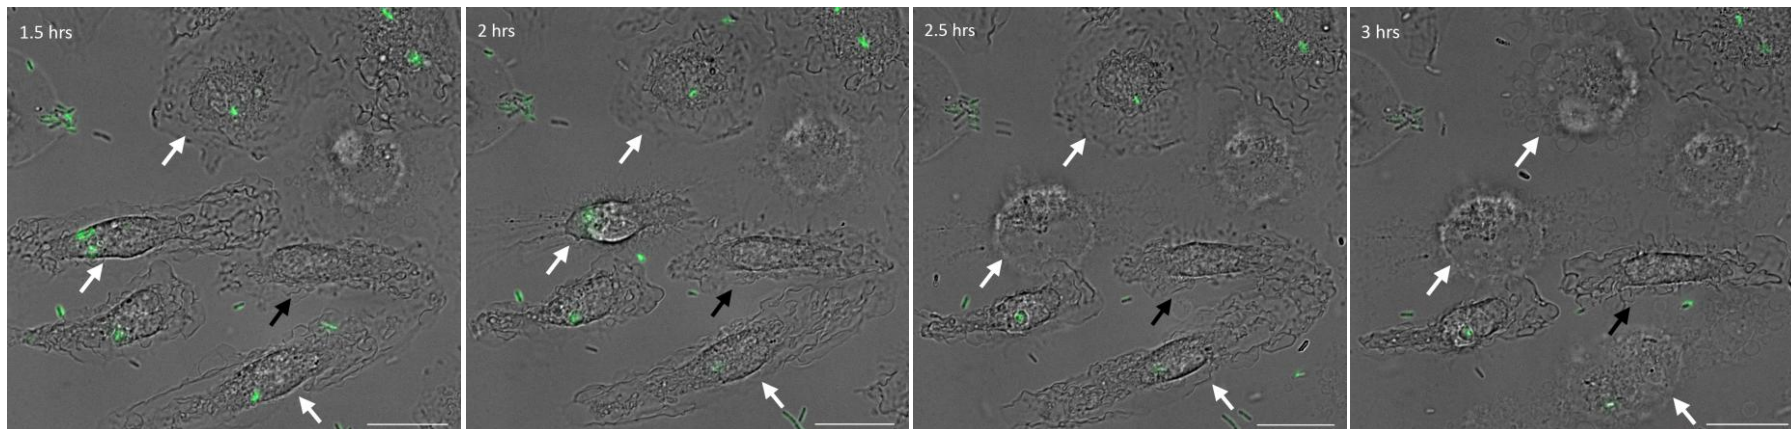

**S2 Fig. Live imaging of primary human macrophages infected with *P. aeruginosa*.** HMDMs were infected with PAO1 wild-type (WT) strain expressing GFP. Time lapse imaging was started at 1.5 hrs post-phagocytosis. Cells were maintained in RPMI supplemented with gentamicin at 37°C and 5% CO<sub>2</sub> throughout imaging. White arrows point at the cells that harbor intracellular bacteria and undergo lysis between 1.5 hrs and 3 hrs post-phagocytosis. Black arrow shows an uninfected and unlysed cell. Scale bar is equivalent to 20 μm.
