# Supplementary material for: Killing from the inside: Intracellular role of T3SS in the fate of Pseudomonas aeruginosa within macrophages revealed by mgtC and oprF mutants
Source: PubMed Central journal article supplement (PMC6586356; doi:10.1371/journal.ppat.1007812), 2019-06-20
Supplement: ppat.1007812.s006.pdf [file ppat.1007812.s006.pdf]

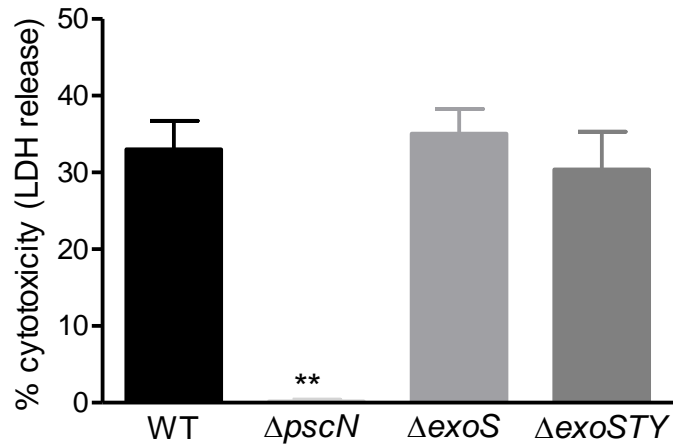

**S6 Fig. Quantification of cell lysis driven by extracellular bacteria.** Release of LDH was measured from J774 macrophages infected for 2 hrs with PAO1 WT,  $\Delta pscN$ ,  $\Delta exoS$  and  $\Delta exoSTY$  strains to quantify the cytotoxicity. The percentage of LDH release was calculated relatively to that of total uninfected cells lysed with Triton X-100, which was set at 100% LDH release. Error bars correspond to standard errors (SE) from at least four independent experiments. The asterisks indicate  $P$  values (One way ANOVA, where all strains were compared to WT using Dunnet's multiple comparison post-test,  $**P < 0.01$ ), showing statistical significance with respect to WT.
