# Supplementary material for: Killing from the inside: Intracellular role of T3SS in the fate of Pseudomonas aeruginosa within macrophages revealed by mgtC and oprF mutants
Source: PubMed Central journal article supplement (PMC6586356; doi:10.1371/journal.ppat.1007812), 2019-06-20
Supplement: ppat.1007812.s010.pdf [file ppat.1007812.s010.pdf]

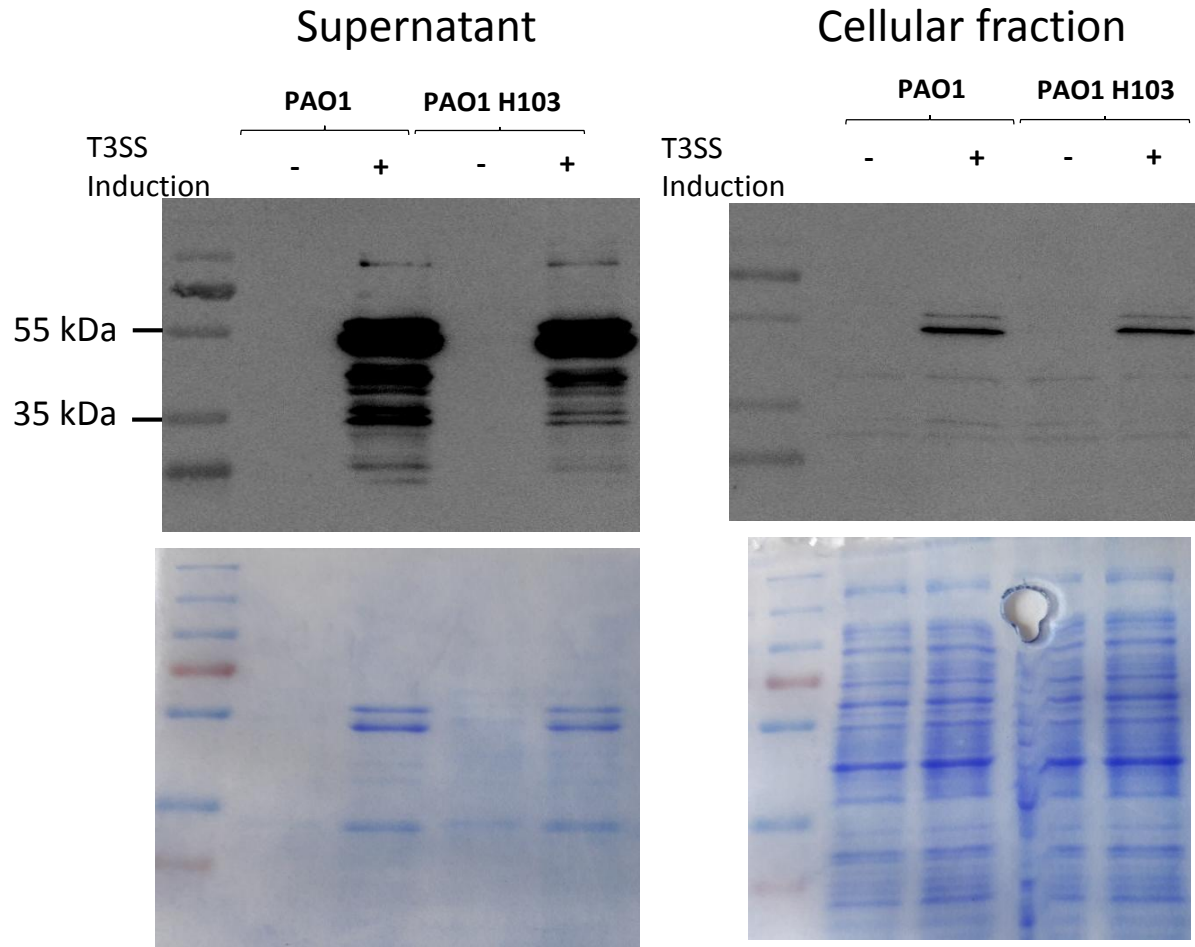

**S10 Fig. Comparison of secreted protein profiles and ExoS production under T3SS-inducing conditions in two PAO1 strains.** Immunodetection of the ExoS effector in culture supernatant of PAO1 and PAO1 H103 (isogenic WT strain for *oprF* mutant) grown in exponential phase at 37°C under T3SS-inducing (– Ca<sup>2+</sup>) or non-inducing (+ Ca<sup>2+</sup>) conditions. The bacterial culture supernatant (equivalent of 1 OD<sub>600</sub> unit) was loaded on an SDS gel containing 10% polyacrylamide. As control, cellular fraction (equivalent of 0.1 OD<sub>600</sub> unit) was loaded. Upper panels show Western blot using anti-ExoS antibodies (Soscia et al., 2007; doi: [10.1128/JB.01677-06](https://doi.org/10.1128/JB.01677-06)) and lower panels show Coomassie stained gels.
