# Supplementary material for: Killing from the inside: Intracellular role of T3SS in the fate of Pseudomonas aeruginosa within macrophages revealed by mgtC and oprF mutants
Source: PubMed Central journal article supplement (PMC6586356; doi:10.1371/journal.ppat.1007812), 2019-06-20
Supplement: ppat.1007812.s012.pdf [file ppat.1007812.s012.pdf]

**S1 Table. List of primers used for RT-PCR.**

| <b>RT primers</b>   | <b>Sequence</b>             |
|---------------------|-----------------------------|
| <i>rpoD</i> -RT-fwd | 5'-GGGCGAAGAAGGAAATGGTC-3'  |
| <i>rpoD</i> -RT-rev | 5'-CAGGTGGCGTAGGTGGAGAA-3'  |
| <i>exoS</i> -RT-fwd | 5'-GCCTTGTCGAGTCCCTTCAA-3'  |
| <i>exoS</i> -RT-rev | 5'-CTTCGTGGCGATCATGGACT-3'  |
| <i>pcrV</i> -RT-fwd | 5'-TGGGTCTGCAGGACATCCTT-3'  |
| <i>pcrV</i> -RT-rev | 5'-AACGACTGGAACAAGCCCTAC-3' |
| <i>fliC</i> -RT-fwd | 5'-CCTGCAGAAAGAAGTCGCTG-3'  |
| <i>fliC</i> -RT-rev | 5'-GTTGCTGCCGACCTGGTAA-3'   |
